# Supplementary material for: Co-crystals of tetrakis-1,2,3,4-(4′-carboxyphenyl)cyclobutane with dipyridyl spacers: design and serendipity
Source: Royal Society of Chemistry journal article supplement (doi:10.1039/c2ce25513h), 2012-01-01
Supplement: c2ce25513h.pdf [file c2ce25513h.pdf]

## Supporting Information

### Co-crystals of *tetrakis*-1,2,3,4-(4'-carboxyphenyl) cyclobutane with dipyridyl spacers: design and serendipity

Goutam Kumar Kole,<sup>a</sup> Geok Kheng Tan<sup>a</sup> and Jagadese J. Vittal\*<sup>a,b</sup>

<sup>a</sup>Department of Chemistry, National University of Singapore, 3 Science Drive 3, Singapore – 117543. Fax: +65 67791691; Tel: +65 65162975; E-mail: [chmjiv@nus.edu.sg](mailto:chmjiv@nus.edu.sg)

<sup>b</sup>Department of Chemistry, Gyeongsang National University, Jinju, S. Korea – 660 701.

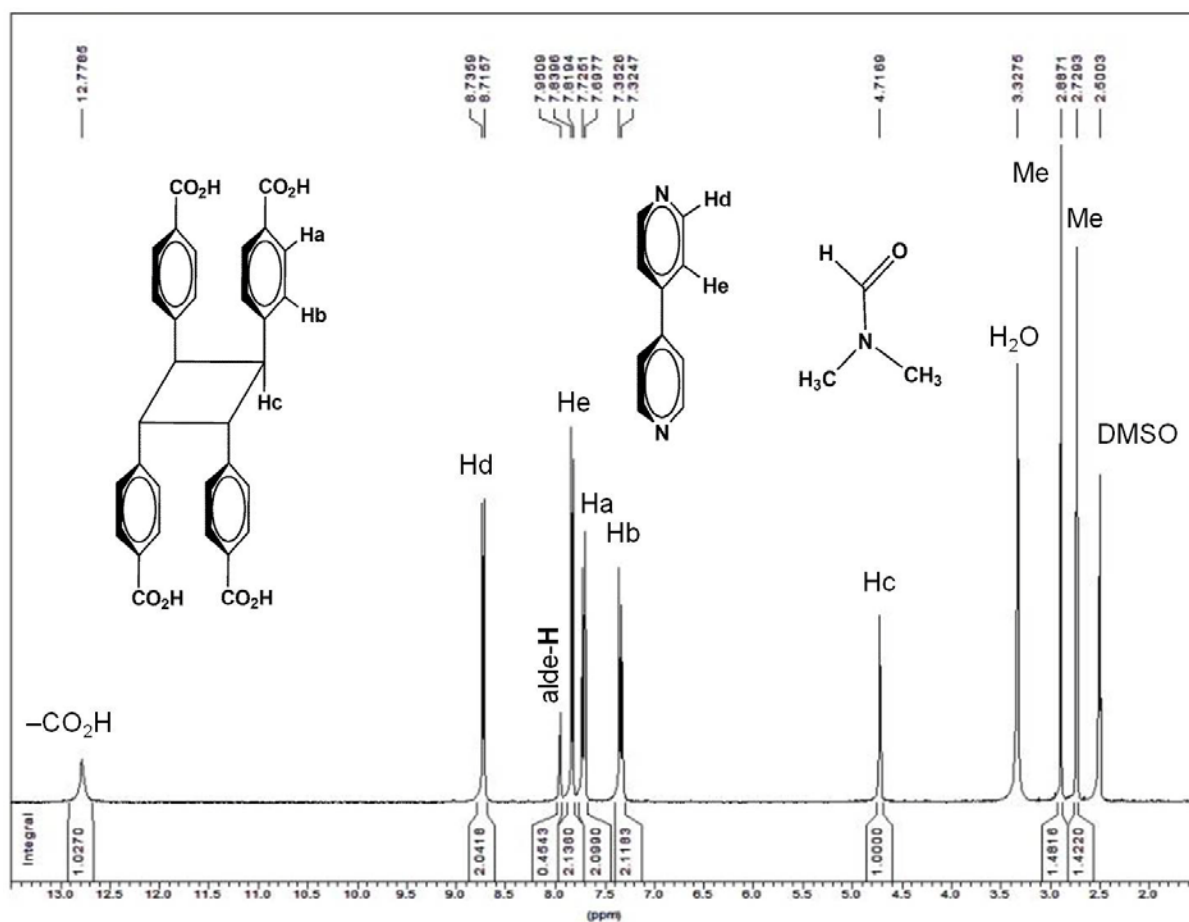

Figure S1: <sup>1</sup>H-NMR (300 MHz, *d*<sub>6</sub>-DMSO) spectrum of 1. The integration values show that the ratio of TCCB and 4,4'-bpy is 1:2.

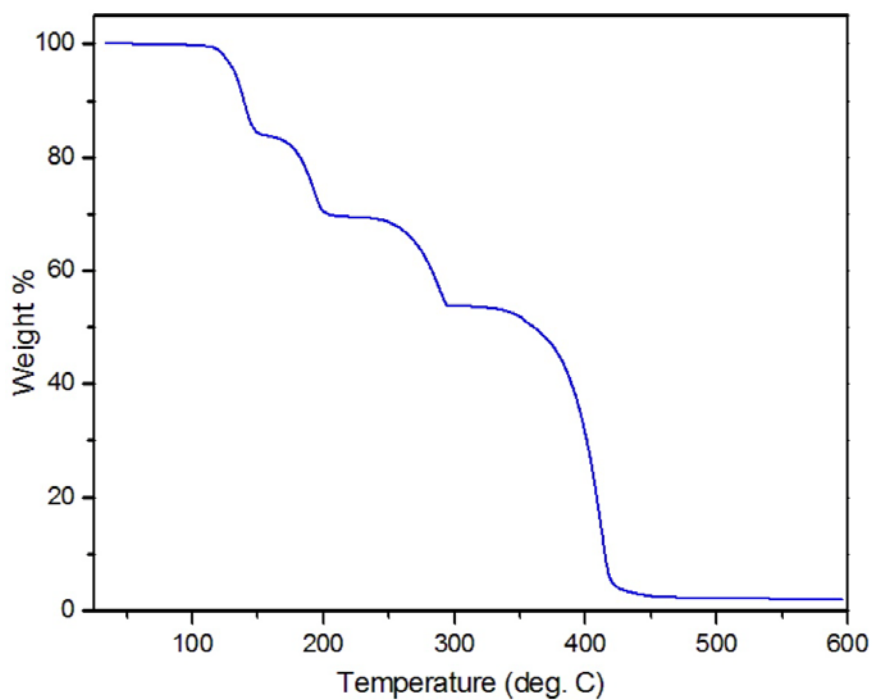

Figure S2: TGA of 1. The observed solvent (DMF) loss is 15.8% where as the calculated value is 14.7 %.

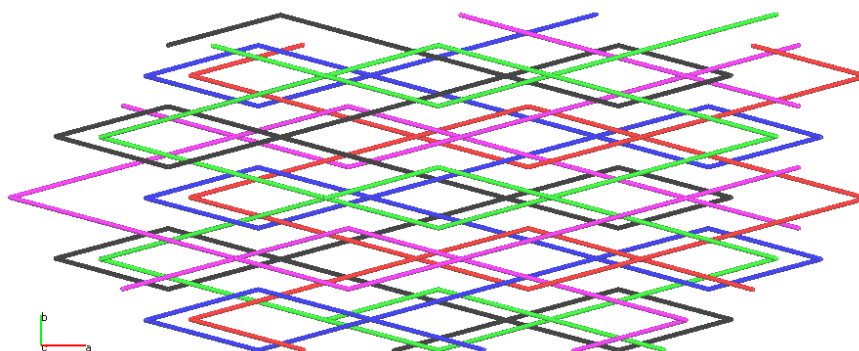

Figure S3: 5 Different interpenetrated 'dmp' nets in 1 are shown in 5 different colours.

**Table S1** The hydrogen bonding parameters for **1**

| D-H...A        | D(D-H)<br>(Å) | D(H...A)<br>(Å) | D(D...A)<br>(Å) | <(DHA)<br>(°) | Symmetry Operator |
|----------------|---------------|-----------------|-----------------|---------------|-------------------|
| O1-H1...N1     | 0.84          | 1.85            | 2.683(4)        | 174.4         | -x, 1-y, 1-z      |
| O3-H3...N2     | 0.84          | 1.84            | 2.673(4)        | 175           | -x, 1-y, 1-z      |
| C1S-H1S...O2   | 0.95          | 2.48            | 3.195(5)        | 132.2         | -x, 1-y, 1-z      |
| C7S-H7S...O2   | 0.95          | 2.46            | 3.340(5)        | 154.5         | x, y, -1+z        |
| C9S-H9S...O2   | 0.95          | 2.46            | 3.345(5)        | 156           | -x, 1-y, 1-z      |
| C10S-H10S...O4 | 0.95          | 2.53            | 3.211(5)        | 128.3         | 1-x, 1-y, 1-z     |

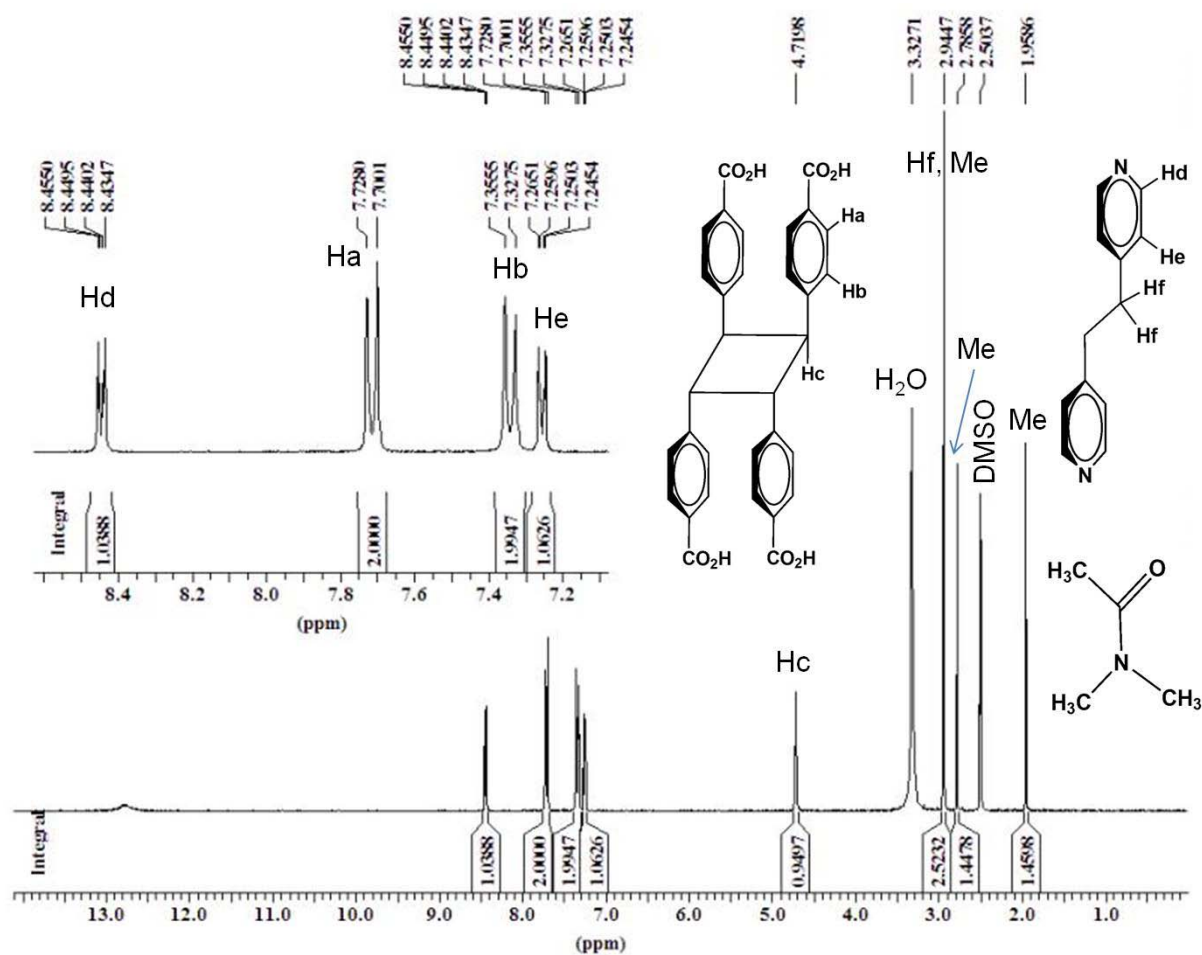

Figure S4: <sup>1</sup>H-NMR (300 MHz, *d*<sub>6</sub>-DMSO) spectrum of **2**. The integration values show that the ratio of TCCB and 4,4'-bpethane is 1:1.

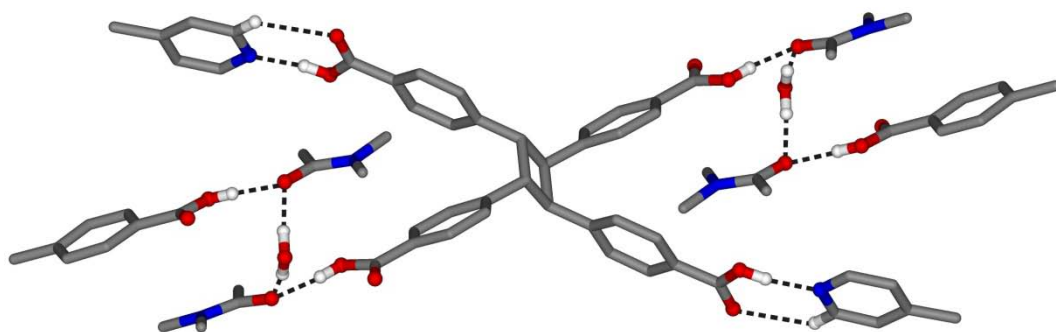

Figure S5: Crystal structure of **2**. Supramolecular interactions around each TCCB are shown.

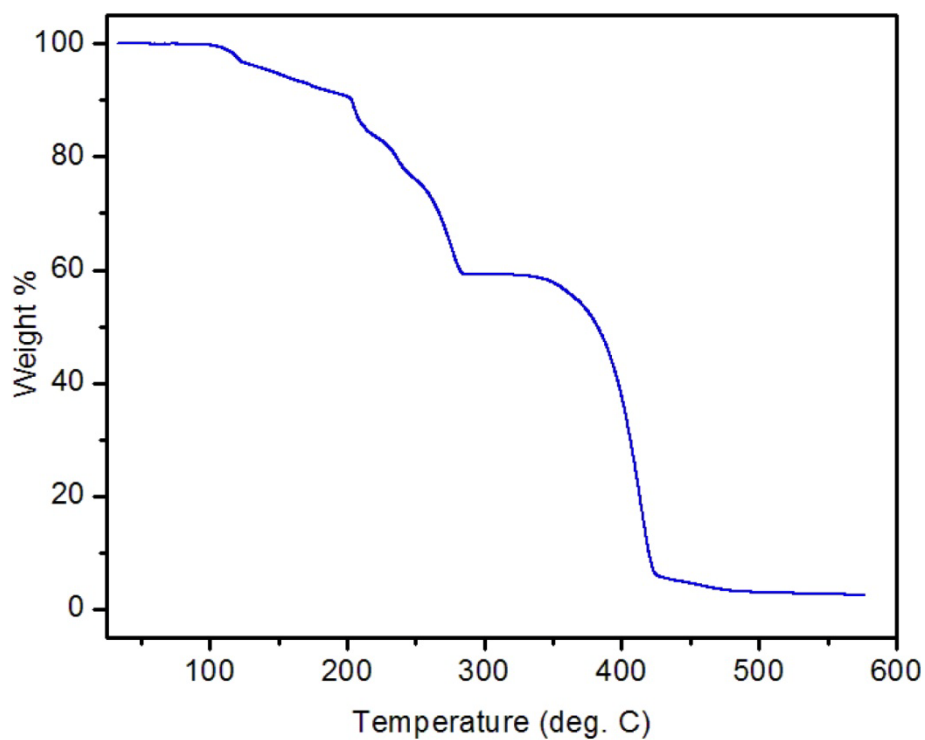

Figure S6: TGA of **2**. The weight loss observed at 285 °C is 40.7% which can be matched with the sum of solvent loss (21.05%) and weight loss due to decarboxylation of TCCB (19.27%).

**Table 2** The hydrogen bonding parameters for **2**

| D-H...A       | D(D-H)<br>(Å) | D(H...A)<br>(Å) | D(D...A)<br>(Å) | <(DHA) (°) | Symmetry Operator |
|---------------|---------------|-----------------|-----------------|------------|-------------------|
| O1-H1...N1    | 0.84          | 1.73            | 2.560(3)        | 172        | x, -1+y, -1+z     |
| O1W-H1WA...O5 | 0.91          | 1.96            | 2.855(5)        | 168(4)     | 1-x, y, 1/2-z     |
| O3-H3...O5    | 0.84          | 1.76            | 2.594(3)        | 172        | 1-x, y, 1/2-z     |
| C17-H17...O2  | 0.95          | 2.57            | 3.260(4)        | 130        | x, 1+y, 1+z       |
| C20-H20...O4  | 0.95          | 2.57            | 3.340(4)        | 138        | 1-x, y, 3/2-z     |

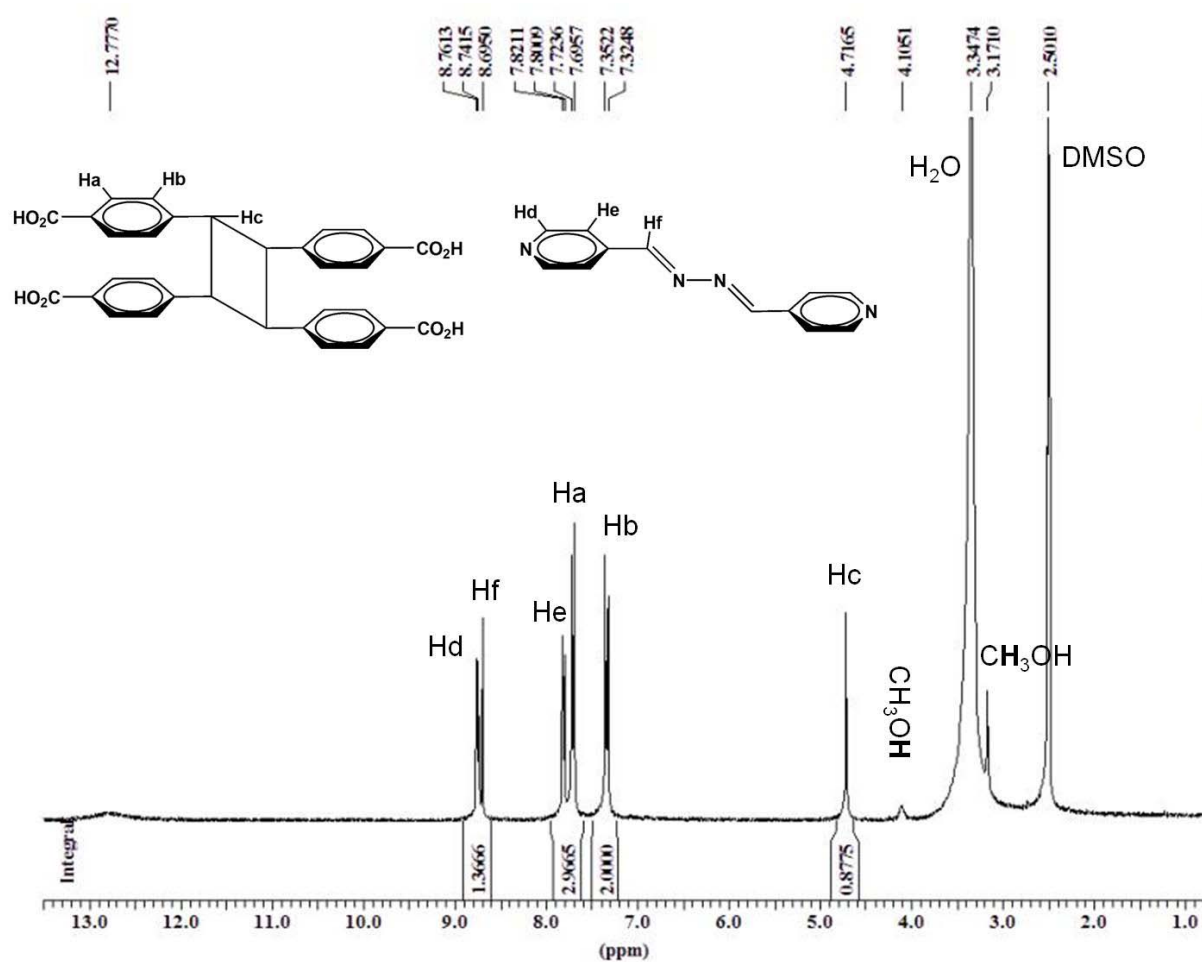

Figure S7: <sup>1</sup>H-NMR (300 MHz, *d*<sub>5</sub>-DMSO) spectrum of **4**.

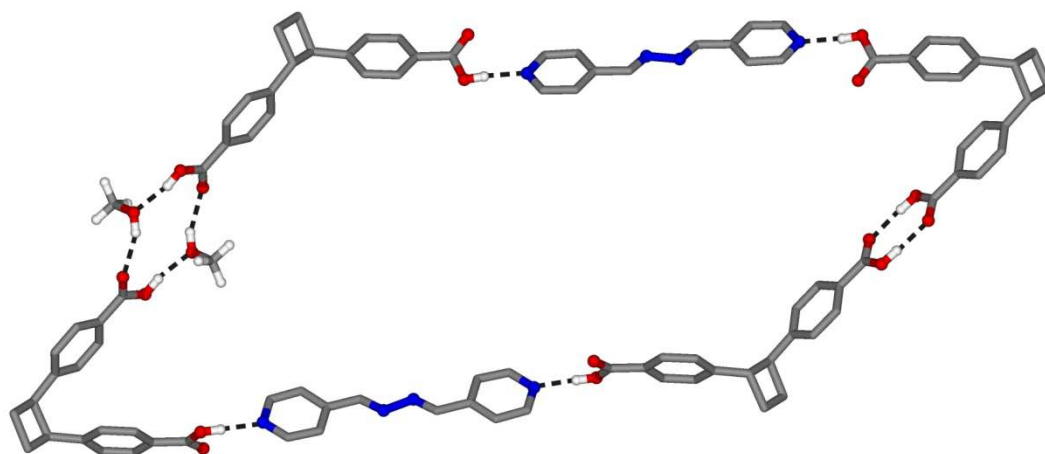

Figure S8: Supramolecular synthons and hydrogen bonded motifs in **4** are shown. One single loop of (4,4) connected net in **4**.

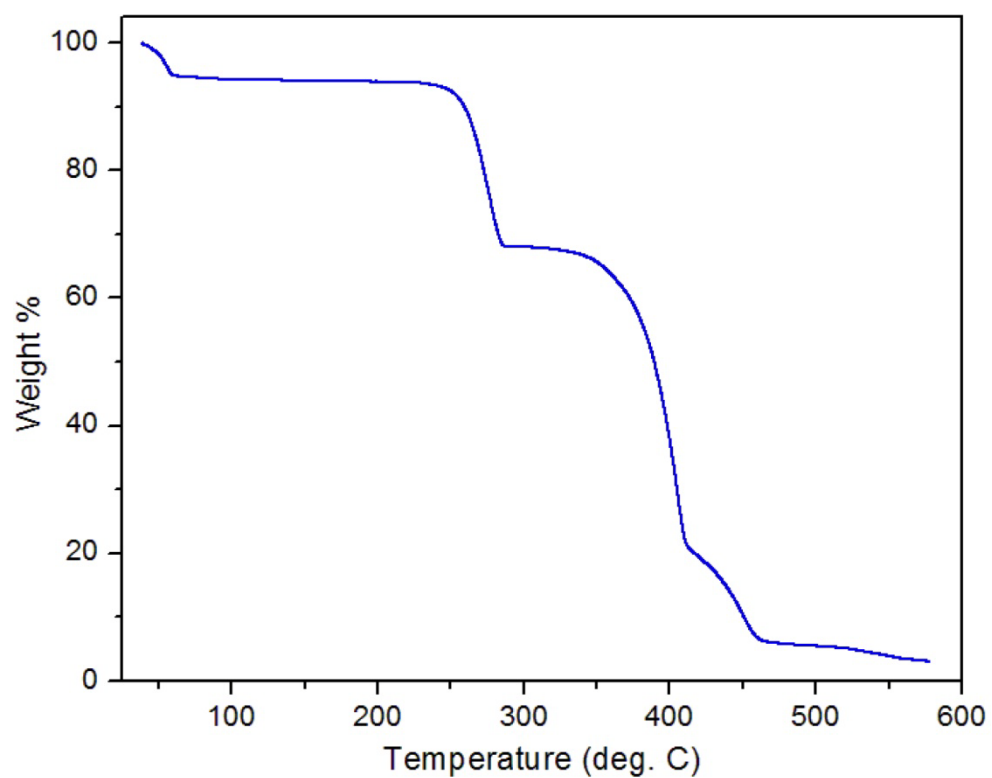

Figure S9: TGA plot for **4**. The observed weight loss in TGA experiment is 5.1%, whereas the calculated value is 4.1%.

**Table 7.4** The hydrogen bonding parameters for **4**

| D-H...A      | D(D-H)<br>(Å) | D(H...A)<br>(Å) | D(D...A)<br>(Å) | <(DHA) (°) | Symmetry Operator     |
|--------------|---------------|-----------------|-----------------|------------|-----------------------|
| O1S-H1S...O3 | 0.84          | 1.95            | 2.735(2)        | 156        | x+1/2, -y+1/2, z+1/2  |
| O8-H8...O7   | 0.84          | 1.84            | 2.669(2)        | 172        | -x, -y+1, -z+1        |
| O6-H6...N3   | 0.84          | 1.80            | 2.638(3)        | 175        | x-1, y-1, z           |
| O4-H4...O1S  | 0.84          | 1.83            | 2.657(2)        | 169        | -x+1/2, y-1/2, -z+1/2 |
| O2-H2...N1   | 0.84          | 1.79            | 2.628(3)        | 176        |                       |
| C27-H27...O2 | 0.95          | 2.45            | 3.313(3)        | 151        | 1/2-x, -1/2+y, 1/2-z  |

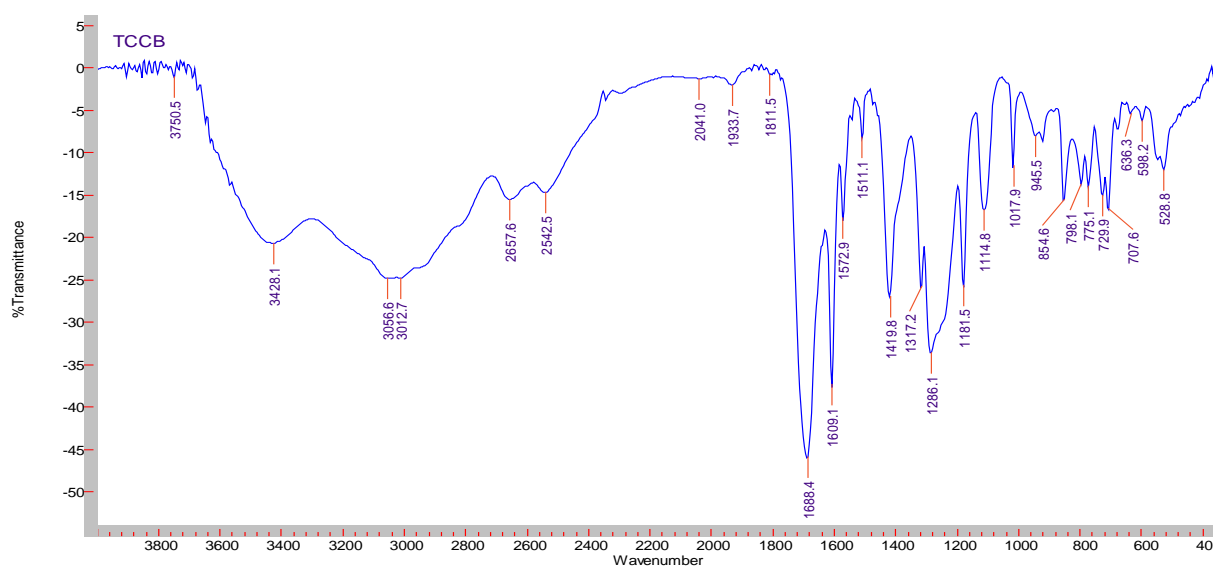

Figure S10: FT-IR spectrum for TCCB alone

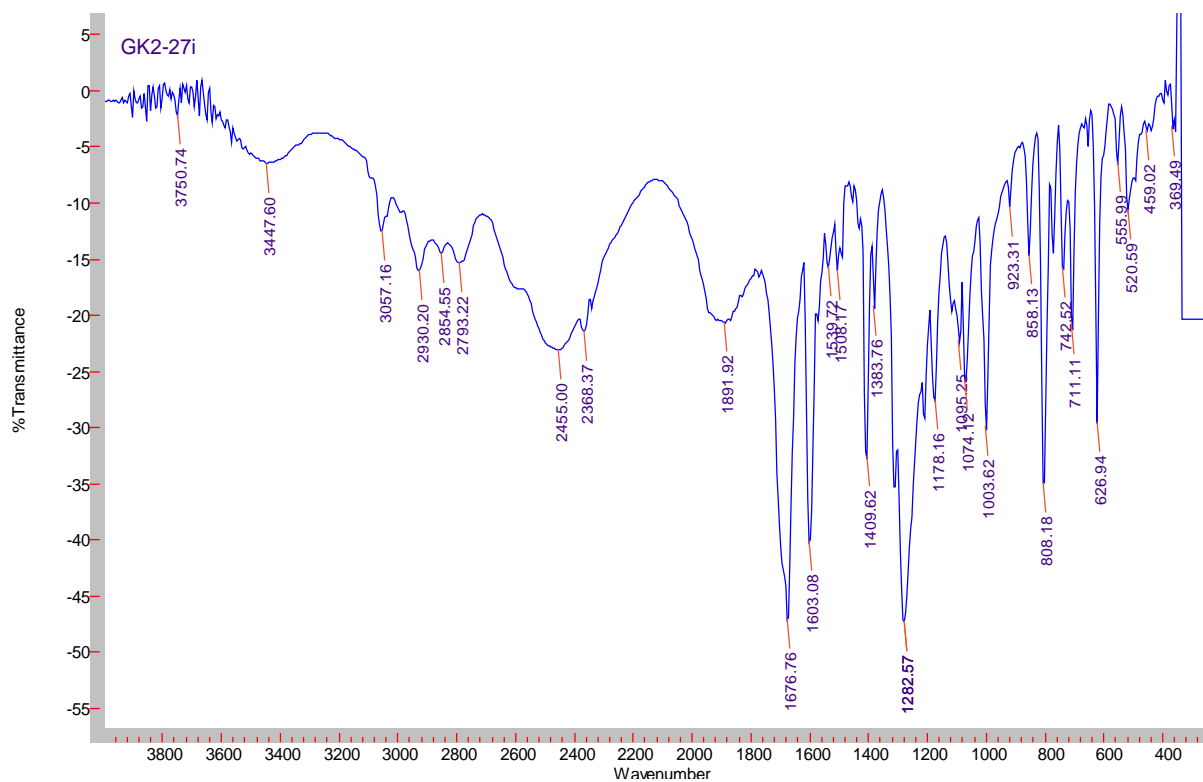

Figure S11: FT-IR spectrum for co-crystal 1

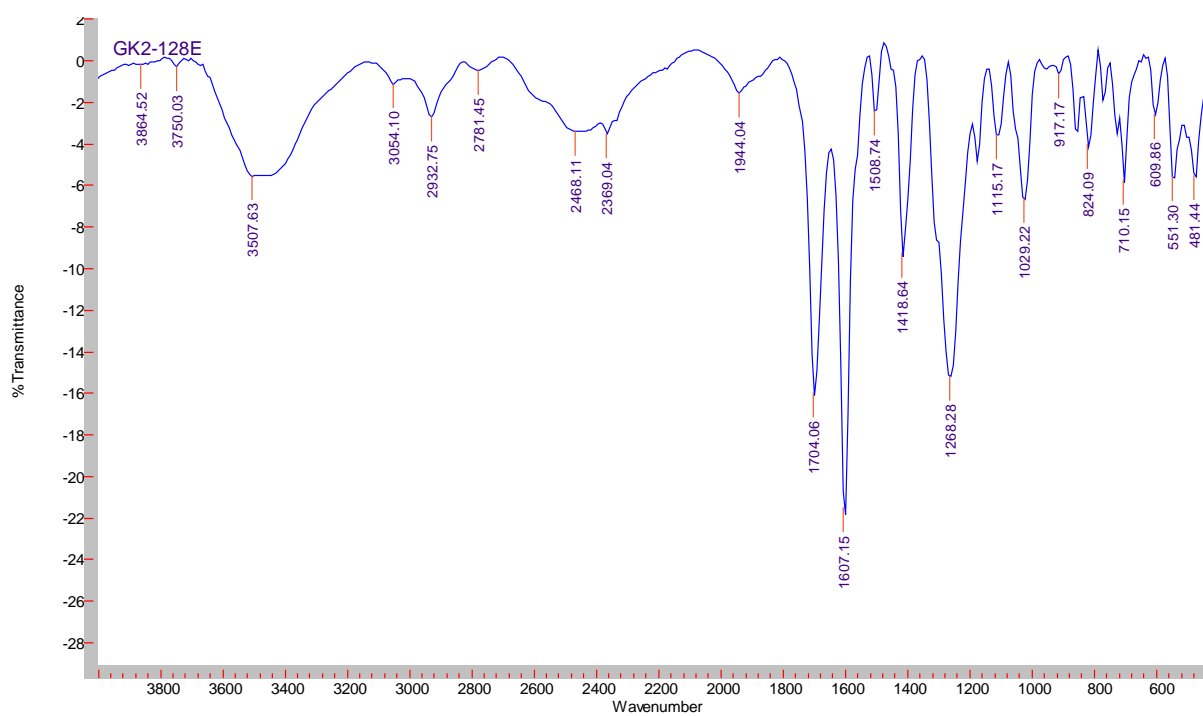

Figure S12: FT-IR spectrum for co-crystal 2



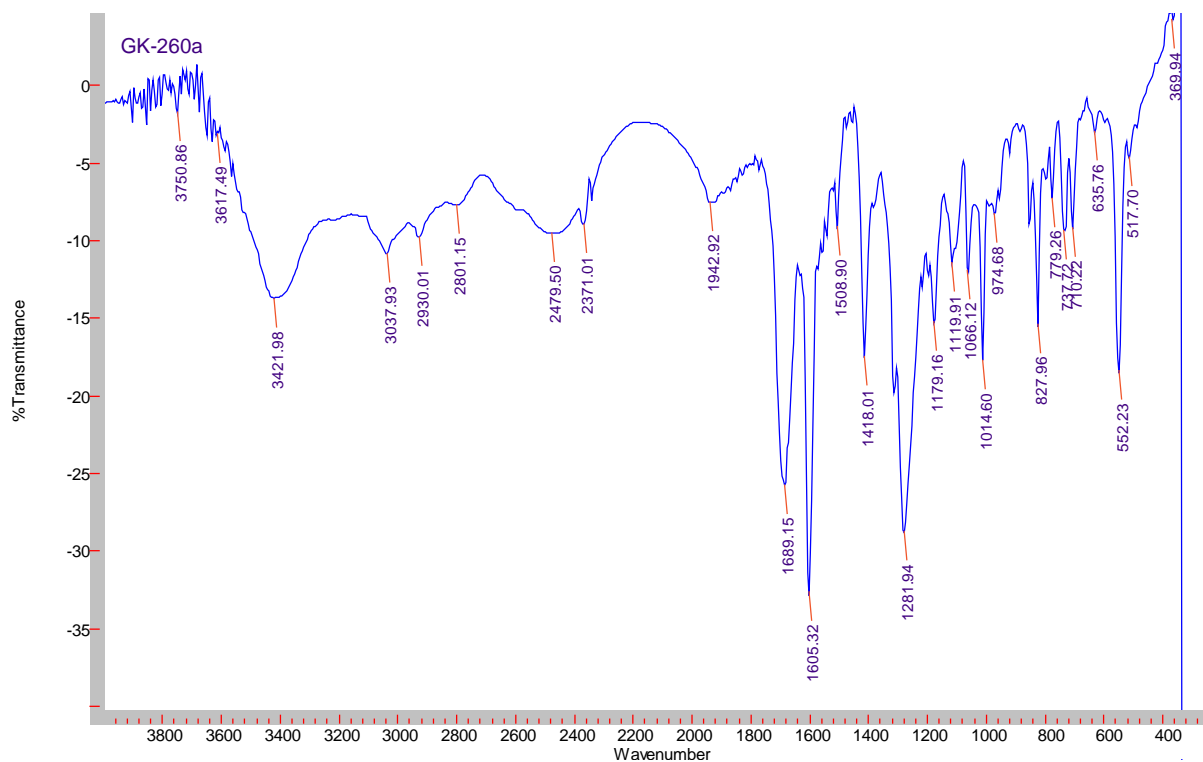

Figure S13: FT-IR spectrum for co-crystal 3

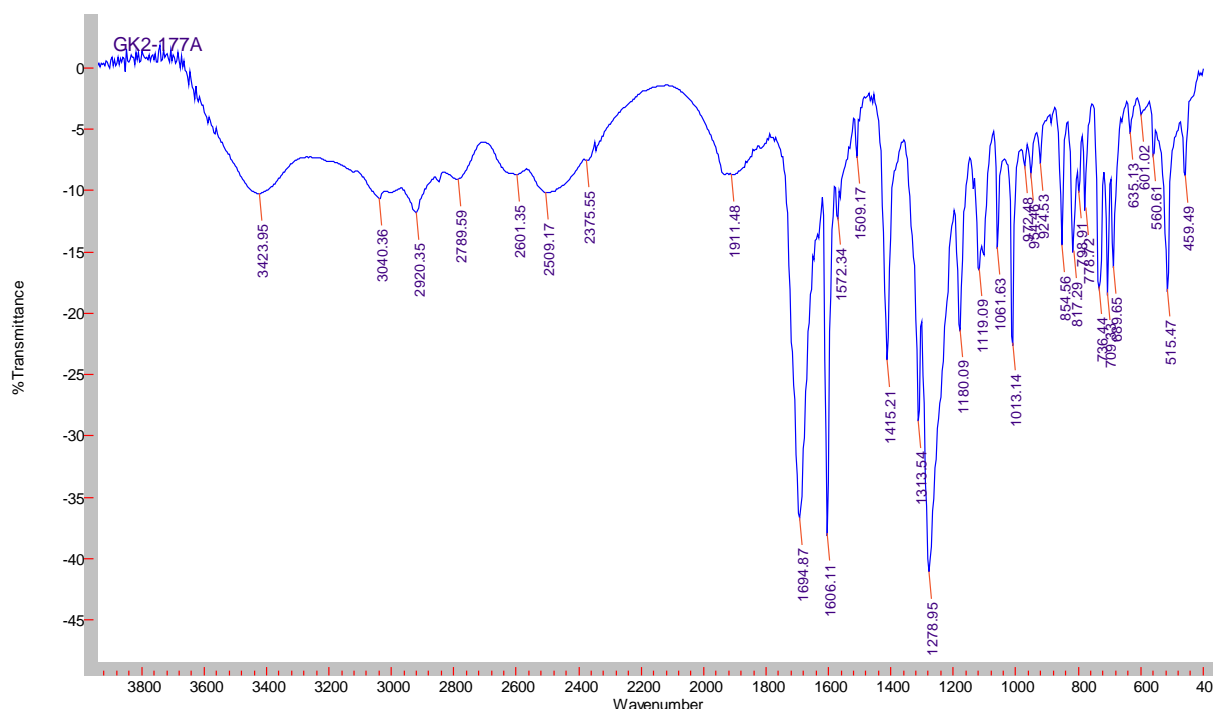

Figure S14: FT-IR spectrum for co-crystal 4

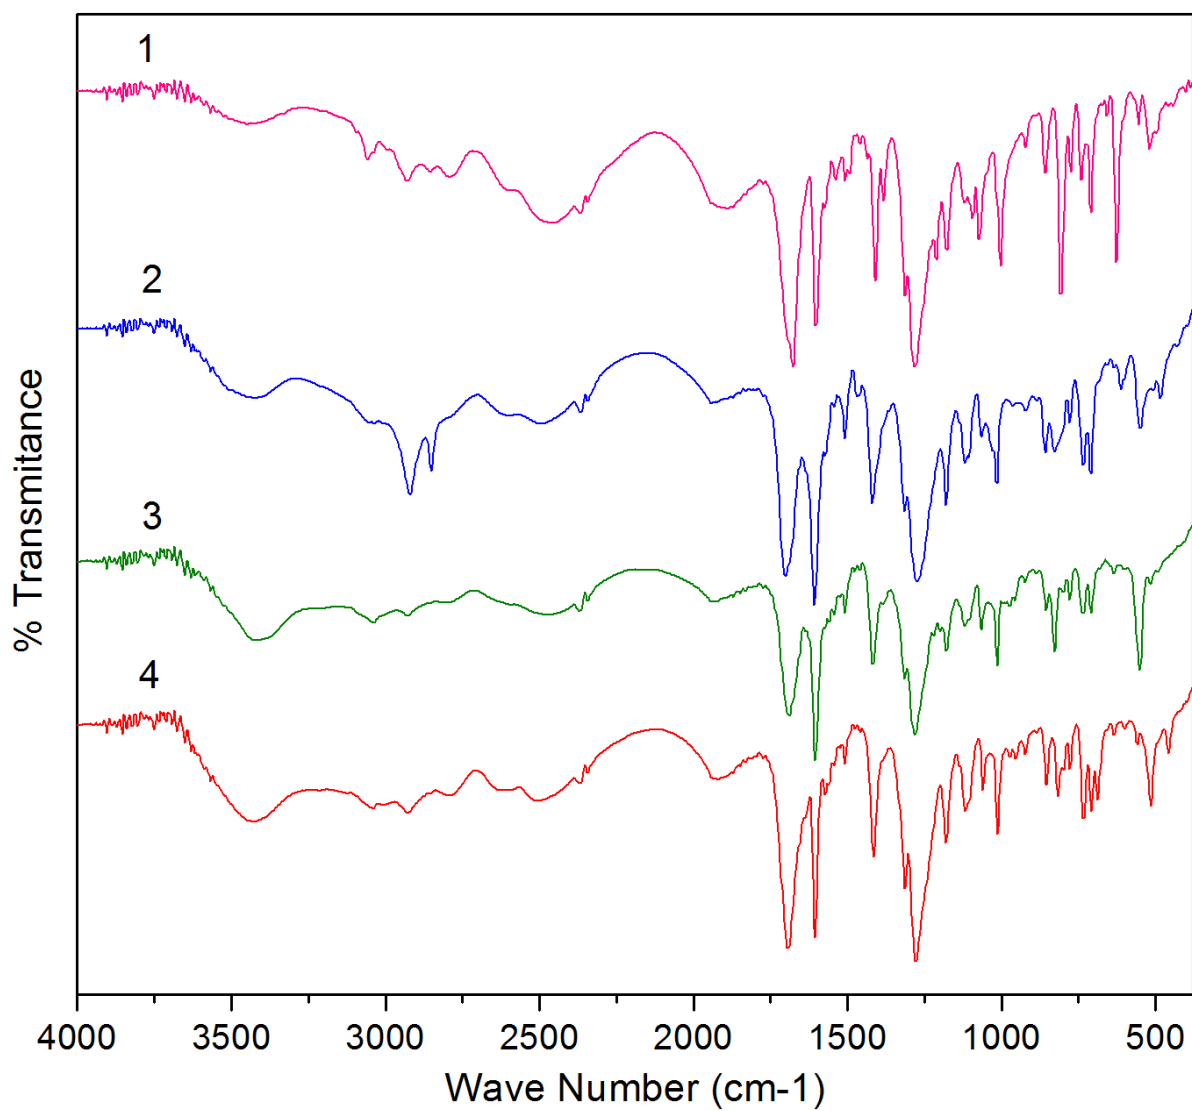

Figure S15: Overlay plot of IR spectra for co-crystals 1 – 4.
